# Supplementary material for: Arcflow Formulations and Constraint Generation Frameworks for the Two Bar Charts Packing Problem
Source: Atypon-hosted journal article supplement (doi:10.1287/ijoc.2022.1256), 2023-03-01
Supplement: ijoc.2022.1256.sm1.pdf [file ijoc.2022.1256.sm1.pdf]

# Arcflow formulations and constraint generation frameworks for the two-bar charts packing problem – online supplement

## A Pseudo-codes for graph construction

Algorithm 1 gives a pseudo-code for the graph construction procedure for the arcflow model for the 2D-VPP. This algorithm incorporates some of the symmetry reduction techniques introduced by Brandão and Pedroso (2016). The same graph is also used for the first steps of Eulerian-flow and link-flow.

---

### Algorithm 1 Graph construction for the 2D-VPP arcflow model

---

**Require:** ordered  $w_i, q_i$  ( $i = 1, 2, \dots, n$ ),  $c$

```

1:  $V \leftarrow \{(0, 0)\}; V' \leftarrow V; A \leftarrow \emptyset$ 
2: for  $i = 1, 2, \dots, n$  do ▷ for every bar chart type
3:   for all  $(v_1, v_2) \in V$  do ▷ for every potential tail (or active vertex)
4:      $(d_1, d_2) \leftarrow (v_1, v_2)$  ▷ define the arc tail
5:     for  $k = 1, 2, \dots, q_i$  do ▷ for every unit of demand
6:        $(e_1, e_2) \leftarrow (d_1, d_2) + (w_{i1}, w_{i2})$  ▷ define the arc head
7:       if  $e_1 \leq c$  and  $e_2 \leq c$  then ▷ if the head is feasible
8:          $V' \leftarrow V' \cup \{(e_1, e_2)\};$  ▷ save the new head
9:          $A \leftarrow A \cup \{((d_1, d_2), (e_1, e_2))\}$  ▷ create the arc
10:         $(d_1, d_2) \leftarrow (e_1, e_2)$  ▷ the new tail is now the old head
11:    $V \leftarrow V'$  ▷ add every head added for bar chart  $i$  to the set of active vertices

```

**Ensure:**  $G = (V, A)$

---

Algorithm 2 gives a pseudo-code for the graph construction procedure for Eulerian-flow. Instead of creating a graph from scratch for each vertex in  $V^h$ , it “shifts” the first dimension of both the tail and the head of every arc contained in  $A^\alpha$  by  $v$  for every  $v \in V^h$ . Note that appropriate data structures (such as sets) should be used for vertex and arc sets to avoid duplicates.

---

### Algorithm 2 Graph construction for Eulerian-flow

---

**Require:** ordered  $w_i, q_i$  ( $i = 1, 2, \dots, n$ ),  $c$

```

1: apply Algorithm 1 to obtain graph  $G^\alpha = (V^\alpha, A^\alpha); V^\gamma \leftarrow V^\alpha; A^\gamma \leftarrow A^\alpha; V^h \leftarrow \emptyset$ 
2: for all  $(v_1, v_2) \in V^\alpha : v_2 \neq 0$  do ▷ for every vertex with non-zero second dimension
3:    $V^h \leftarrow V^h \cup \{v_2\}; V^\gamma \leftarrow V^\gamma \cup \{(v_2, 0)\}$  ▷ save distinct  $v_2$  values
4: for all  $v \in V^h$  do ▷ for every  $v_2$  value
5:   for all  $((d_1, d_2), (e_1, e_2)) \in A^\alpha$  do ▷ for every existing arc
6:     if  $e_1 + v \leq c$  then ▷ if the head of the “shifted” arc is feasible
7:        $V^\gamma \leftarrow V^\gamma \cup \{(d_1 + v, d_2)\} \cup \{(e_1 + v, e_2)\}$  ▷ add the new tail/head in the set of vertices
8:        $A^\gamma \leftarrow A^\gamma \cup \{((d_1 + v, d_2), (e_1 + v, e_2))\}$  ▷ add the new arc in the set of arcs
9: for all  $(v_1, v_2) \in V^\gamma$  do ▷ for every existing vertex
10:   $A^\gamma \leftarrow A^\gamma \cup \{((v_1, v_2), (v_2, 0))\}$  ▷ create a transition arc

```

**Ensure:**  $G^\gamma = (V^\gamma, A^\gamma)$

---

## B Size and continuous relaxation values of the tested ILP models on data sets U-GEN, U-SMA, U-MED, and U-BIG

We report in Table 8 some supplementary information about the tested models on data set U-GEN. Column “# opt” indicates the number of times the continuous relaxation value of the model rounded up was equal to the optimal solution value. Column “diff” reports the difference between the optimal solution value and the continuous relaxation value of the model (which is itself reported in column “LP”). Columns “# var” and “# cons” indicate the average number of variables and constraints in the models.

Table 8: Size and continuous relaxation values of the tested models on data set U-GEN

| $c$ | $\Omega$ | ERZIN |      |      |        |           |        | EUL-REL |      |       |        |           |        | LINK-REL |      |      |        |         |        |
|-----|----------|-------|------|------|--------|-----------|--------|---------|------|-------|--------|-----------|--------|----------|------|------|--------|---------|--------|
|     |          | # opt | diff | time | LP     | # var     | # cons | # opt   | diff | time  | LP     | # var     | # cons | # opt    | diff | time | LP     | # var   | # cons |
| 50  | 10       | 3     | 1.4  | 0    | 9.7    | 133       | 33     | 10      | 0.3  | 0     | 10.8   | 421       | 226    | 10       | 0.3  | 0    | 10.8   | 94      | 77     |
|     | 50       | 0     | 3.0  | 0    | 50.5   | 2990      | 167    | 10      | 0.4  | 0.2   | 53.1   | 8002      | 1752   | 10       | 0.4  | 0    | 53.1   | 1657    | 746    |
|     | 100      | 0     | 4.3  | 0.1  | 103.0  | 11 752    | 334    | 10      | 0.4  | 0.8   | 106.9  | 19 644    | 2239   | 10       | 0.4  | 0.1  | 106.9  | 6301    | 1521   |
|     | 500      | 1     | 6.6  | 6.3  | 512.0  | 254 592   | 1572   | 10      | 0.3  | 6.8   | 518.3  | 129 492   | 2915   | 10       | 0.3  | 3    | 518.3  | 68 258  | 2773   |
|     | 1000     | 0     | 14.7 | 38.4 | 1023.5 | 905 410   | 3025   | 10      | 0.4  | 13.9  | 1037.8 | 243 906   | 3320   | 10       | 0.4  | 6.7  | 1037.8 | 149 645 | 3263   |
| 100 | 10       | 2     | 1.5  | 0    | 10.1   | 141       | 35     | 9       | 0.3  | 0     | 11.3   | 371       | 205    | 9        | 0.3  | 0    | 11.3   | 84      | 74     |
|     | 50       | 0     | 3.1  | 0    | 50.6   | 3114      | 171    | 10      | 0.1  | 1.3   | 53.6   | 19 833    | 5273   | 10       | 0.1  | 0    | 53.6   | 2500    | 1205   |
|     | 100      | 0     | 4.0  | 0.1  | 101.6  | 11 751    | 332    | 10      | 0.2  | 7.9   | 105.4  | 57 676    | 7462   | 10       | 0.2  | 0.5  | 105.4  | 12 782  | 3734   |
|     | 500      | 0     | 7.3  | 7.1  | 503.5  | 267 597   | 1581   | 10      | 0.4  | 82    | 510.4  | 468 857   | 10 120 | 10       | 0.4  | 33.2 | 510.4  | 208 137 | 9179   |
|     | 1000     | 0     | 10.2 | 48.2 | 1008.0 | 1 026 480 | 3109   | 10      | 0.4  | 215.9 | 1017.8 | 1 022 159 | 10 754 | 10       | 0.4  | 79.8 | 1017.8 | 515 538 | 10 275 |

We gather in Tables 9 and 10 some supplementary information about the tested models on data sets U-SMA, U-MED, and U-BIG.

Table 9: Size and continuous relaxation values of the tested models on data set U-SMA

| $c$ | $\Omega$ | ERZIN |      |      |       |        |        | EUL-REL |      |       |       |         |        | LINK-REL |      |      |       |         |        |
|-----|----------|-------|------|------|-------|--------|--------|---------|------|-------|-------|---------|--------|----------|------|------|-------|---------|--------|
|     |          | # opt | diff | time | LP    | # var  | # cons | # opt   | diff | time  | LP    | # var   | # cons | # opt    | diff | time | LP    | # var   | # cons |
| 50  | 10       | 10    | 0.7  | 0    | 1.3   | 17     | 11     | 10      | 0    | 0.1   | 2.0   | 4550    | 1170   | 10       | 0    | 0    | 2.0   | 659     | 295    |
|     | 50       | 10    | 0.4  | 0    | 6.0   | 164    | 35     | 10      | 0.4  | 1.6   | 6.0   | 32 474  | 2152   | 10       | 0.4  | 0.9  | 6.0   | 20 421  | 1786   |
|     | 100      | 10    | 0.4  | 0    | 11.8  | 347    | 51     | 10      | 0.4  | 2     | 11.8  | 41 377  | 2298   | 10       | 0.4  | 1.2  | 11.8  | 29 738  | 2051   |
|     | 500      | 10    | 0.6  | 0    | 60.5  | 1719   | 156    | 10      | 0.6  | 2.2   | 60.5  | 44 170  | 2352   | 10       | 0.6  | 1.2  | 60.5  | 33 626  | 2129   |
|     | 1000     | 10    | 0.5  | 0    | 120.2 | 3463   | 290    | 10      | 0.5  | 2     | 120.2 | 44 170  | 2352   | 10       | 0.5  | 1.2  | 120.2 | 33 626  | 2129   |
| 100 | 10       | 9     | 0.8  | 0    | 1.2   | 21     | 13     | 10      | 0    | 0.5   | 2.0   | 15 384  | 3482   | 10       | 0    | 0    | 2.0   | 1429    | 647    |
|     | 50       | 10    | 0.5  | 0    | 5.5   | 271    | 52     | 10      | 0.5  | 33.7  | 5.5   | 232 575 | 8733   | 10       | 0.5  | 15.0 | 5.5   | 148 691 | 7365   |
|     | 100      | 10    | 0.5  | 0    | 10.9  | 780    | 87     | 10      | 0.5  | 68.2  | 10.9  | 428 992 | 9360   | 10       | 0.5  | 34.0 | 10.9  | 319 982 | 8531   |
|     | 500      | 10    | 0.4  | 0.1  | 54.9  | 6044   | 219    | 10      | 0.4  | 128.8 | 54.9  | 722 866 | 9734   | 10       | 0.4  | 64.6 | 54.9  | 592 475 | 9266   |
|     | 1000     | 10    | 0.3  | 0.2  | 110.0 | 12 120 | 339    | 10      | 0.3  | 135.2 | 110.0 | 734 934 | 9751   | 10       | 0.3  | 51.9 | 110.0 | 609 910 | 9301   |

Table 10: Size and continuous relaxation values of the tested models on data sets U-MED (top) and U-BIG (bottom)

| $c$ | $\Omega$ | ERZIN |       |      |        |           |        | EUL-REL |      |      |        |         |        | LINK-REL |      |      |        |         |        |
|-----|----------|-------|-------|------|--------|-----------|--------|---------|------|------|--------|---------|--------|----------|------|------|--------|---------|--------|
|     |          | # opt | diff  | time | LP     | # var     | # cons | # opt   | diff | time | LP     | # var   | # cons | # opt    | diff | time | LP     | # var   | # cons |
| 50  | 10       | 0     | 2.1   | 0    | 11.3   | 162       | 38     | 10      | 0.1  | 0    | 13.3   | 135     | 85     | 10       | 0.1  | 0    | 13.3   | 53      | 51     |
|     | 50       | 0     | 4.7   | 0    | 57.0   | 3508      | 189    | 10      | 0.2  | 0    | 61.5   | 2787    | 970    | 10       | 0.1  | 0    | 61.6   | 491     | 308    |
|     | 100      | 0     | 7.6   | 0.1  | 113.1  | 13 571    | 369    | 10      | 0.2  | 0.2  | 120.6  | 9559    | 1641   | 10       | 0.2  | 0    | 120.6  | 2017    | 807    |
|     | 500      | 0     | 30.4  | 8.8  | 575.1  | 302 301   | 1796   | 10      | 0.3  | 1.8  | 605.2  | 61 092  | 2593   | 10       | 0.3  | 0.6  | 605.2  | 21 053  | 2095   |
|     | 1000     | 0     | 53.2  | 50.9 | 1147.8 | 1 071 532 | 3470   | 10      | 0.4  | 4.7  | 1200.6 | 130 781 | 3088   | 10       | 0.4  | 2.1  | 1200.6 | 61 558  | 2790   |
| 100 | 10       | 0     | 2.3   | 0    | 11.1   | 158       | 38     | 10      | 0.2  | 0    | 13.2   | 174     | 107    | 10       | 0.2  | 0    | 13.2   | 64      | 60     |
|     | 50       | 0     | 4.2   | 0    | 55.5   | 3462      | 185    | 10      | 0.3  | 0.1  | 59.4   | 6451    | 2498   | 10       | 0.3  | 0    | 59.4   | 724     | 456    |
|     | 100      | 0     | 7.1   | 0.1  | 111.4  | 13 465    | 367    | 10      | 0.3  | 0.3  | 118.2  | 19 557  | 4510   | 10       | 0.3  | 0    | 118.2  | 2387    | 1213   |
|     | 500      | 0     | 29.5  | 10.5 | 565.7  | 322 551   | 1810   | 10      | 0.4  | 20.3 | 594.8  | 204 405 | 8401   | 10       | 0.4  | 3.8  | 594.8  | 47 117  | 5428   |
|     | 1000     | 0     | 53.8  | 80.2 | 1136.6 | 1 243 855 | 3579   | 10      | 0.3  | 46.9 | 1190.1 | 475 345 | 9531   | 10       | 0.3  | 13.9 | 1190.1 | 141 764 | 7392   |
| 50  | 10       | 0     | 3.1   | 0    | 12.6   | 183       | 42     | 10      | 0    | 0    | 15.7   | 80      | 57     | 10       | 0    | 0    | 15.7   | 41      | 43     |
|     | 50       | 0     | 12.8  | 0.1  | 63.4   | 4161      | 214    | 10      | 0    | 0    | 76.2   | 1065    | 524    | 10       | 0    | 0    | 76.2   | 215     | 183    |
|     | 100      | 0     | 25.1  | 0.2  | 126.5  | 15 923    | 421    | 10      | 0    | 0    | 151.6  | 3182    | 1040   | 10       | 0    | 0    | 151.6  | 503     | 359    |
|     | 500      | 0     | 120.2 | 9.3  | 638.2  | 347 154   | 2031   | 10      | 0    | 0.3  | 758.4  | 20 596  | 2114   | 10       | 0    | 0    | 758.4  | 4030    | 1238   |
|     | 1000     | 0     | 243.9 | 67.1 | 1270.2 | 1 201 931 | 3923   | 10      | 0    | 0.7  | 1514.1 | 41 526  | 2577   | 10       | 0    | 0.2  | 1514.1 | 11 405  | 1818   |
| 100 | 10       | 0     | 2.6   | 0    | 12.3   | 182       | 42     | 10      | 0    | 0    | 14.9   | 93      | 64     | 10       | 0    | 0    | 14.9   | 45      | 47     |
|     | 50       | 0     | 13.8  | 0.1  | 64.3   | 4311      | 218    | 10      | 0    | 0    | 78.1   | 1299    | 691    | 10       | 0    | 0    | 78.1   | 234     | 209    |
|     | 100      | 0     | 22.9  | 0.2  | 123.6  | 16 019    | 417    | 10      | 0    | 0    | 146.5  | 5456    | 2216   | 10       | 0    | 0    | 146.5  | 640     | 466    |
|     | 500      | 0     | 122.6 | 12.0 | 631.6  | 381 932   | 2066   | 10      | 0    | 1.0  | 754.2  | 56 728  | 6089   | 10       | 0    | 0.1  | 754.2  | 5908    | 2393   |
|     | 1000     | 0     | 248.4 | 88.9 | 1262.5 | 1 453 501 | 4062   | 10      | 0    | 3.1  | 1510.9 | 138 577 | 7574   | 10       | 0    | 0.4  | 1510.9 | 16 726  | 3621   |

## C Size and continuous relaxation values of the tested ILP models on data sets TRIPLETS and DONUTS

We gather in Tables 11 and 12 some supplementary information about the tested models on data sets TRIPLETS and DONUTS, respectively.

Table 11: Size and continuous relaxation values of the tested models on data set TRIPLETS

| $c$ | $\bar{z}$ | ERZIN |      |      |     |        | EUL-REL |       |      |       |     | LINK-REL |        |       |      |       |     |        |        |
|-----|-----------|-------|------|------|-----|--------|---------|-------|------|-------|-----|----------|--------|-------|------|-------|-----|--------|--------|
|     |           | # opt | diff | time | LP  | # var  | # cons  | # opt | diff | time  | LP  | # var    | # cons | # opt | diff | time  | LP  | # var  | # cons |
| 80  | 20        | 10    | 0    | 0    | 20  | 727    | 77      | 10    | 0    | 0.1   | 20  | 5871     | 1690   | 10    | 0    | 0     | 20  | 1597   | 713    |
|     | 50        | 10    | 0    | 0    | 50  | 3951   | 185     | 10    | 0    | 0.2   | 50  | 19974    | 2438   | 10    | 0    | 0.1   | 50  | 7224   | 1427   |
|     | 100       | 10    | 0    | 0.2  | 100 | 13826  | 355     | 10    | 0    | 0.7   | 100 | 40870    | 2731   | 10    | 0    | 0.4   | 100 | 15569  | 1758   |
|     | 250       | 10    | 0    | 1    | 250 | 62973  | 809     | 10    | 0    | 1.7   | 250 | 81472    | 2975   | 10    | 0    | 1.2   | 250 | 36008  | 2075   |
| 240 | 20        | 10    | 0    | 0    | 20  | 736    | 77      | 10    | 0    | 0.1   | 20  | 12044    | 5271   | 10    | 0    | 0     | 20  | 2161   | 1202   |
|     | 50        | 10    | 0    | 0.1  | 50  | 4482   | 193     | 10    | 0    | 1.1   | 50  | 79751    | 13271  | 10    | 0    | 0.4   | 50  | 19134  | 5366   |
|     | 100       | 10    | 0    | 0.2  | 100 | 17461  | 384     | 10    | 0    | 7.9   | 100 | 264103   | 18184  | 10    | 0    | 5.3   | 100 | 81688  | 9204   |
|     | 250       | 10    | 0    | 2    | 250 | 103207 | 943     | 10    | 0    | 49.1  | 250 | 874338   | 22012  | 10    | 0    | 27.3  | 250 | 292389 | 12989  |
| 400 | 20        | 10    | 0    | 0    | 20  | 748    | 78      | 10    | 0    | 0.1   | 20  | 14448    | 6834   | 10    | 0    | 0     | 20  | 2215   | 1310   |
|     | 50        | 10    | 0    | 0.1  | 50  | 4559   | 195     | 10    | 0    | 2     | 50  | 114947   | 27394  | 10    | 0    | 0.3   | 50  | 24055  | 9018   |
|     | 100       | 10    | 0    | 0.2  | 100 | 17925  | 388     | 10    | 0    | 17.3  | 100 | 475069   | 40289  | 10    | 0    | 11.3  | 100 | 120840 | 17747  |
|     | 250       | 10    | 0    | 2.1  | 250 | 108130 | 959     | 10    | 0    | 155.7 | 250 | 2138746  | 56063  | 10    | 0    | 143.5 | 250 | 662809 | 30044  |

Table 12: Size and continuous relaxation values of the tested models on data set DONUTS

| $c$ | $\bar{z}$ | ERZIN |      |      |     |        | EUL-REL |       |      |      |     | LINK-REL |        |       |      |      |     |        |        |
|-----|-----------|-------|------|------|-----|--------|---------|-------|------|------|-----|----------|--------|-------|------|------|-----|--------|--------|
|     |           | # opt | diff | time | LP  | # var  | # cons  | # opt | diff | time | LP  | # var    | # cons | # opt | diff | time | LP  | # var  | # cons |
| 80  | 20        | 0     | 1    | 0    | 26  | 865    | 88      | 0     | 1    | 0    | 26  | 3309     | 978    | 0     | 1    | 0    | 26  | 1041   | 421    |
|     | 50        | 0     | 1    | 0    | 62  | 2985   | 185     | 0     | 1    | 0.1  | 62  | 5308     | 1158   | 0     | 1    | 0    | 62  | 1797   | 535    |
|     | 100       | 0     | 1    | 0.1  | 122 | 7235   | 335     | 0     | 1    | 0.1  | 122 | 6716     | 1251   | 0     | 1    | 0    | 122 | 2404   | 602    |
|     | 250       | 0     | 1    | 0.3  | 302 | 20850  | 767     | 0     | 1    | 0.1  | 302 | 7918     | 1306   | 0     | 1    | 0    | 302 | 3007   | 657    |
| 240 | 20        | 0     | 1    | 0    | 26  | 1162   | 97      | 0     | 1    | 0.1  | 26  | 12723    | 4141   | 0     | 1    | 0    | 26  | 3018   | 1305   |
|     | 50        | 0     | 1    | 0.1  | 62  | 5982   | 226     | 0     | 1    | 0.7  | 62  | 46597    | 7095   | 0     | 1    | 0.3  | 62  | 12313  | 2600   |
|     | 100       | 0     | 1    | 0.2  | 122 | 19164  | 417     | 0     | 1    | 1.9  | 122 | 91755    | 8441   | 0     | 1    | 0.9  | 122 | 25698  | 3399   |
|     | 250       | 0     | 1    | 1.6  | 302 | 81096  | 934     | 0     | 1    | 5    | 302 | 175471   | 9449   | 0     | 1    | 2    | 302 | 53536  | 4181   |
| 400 | 20        | 0     | 1    | 0    | 26  | 1248   | 100     | 0     | 1    | 0.2  | 26  | 19897    | 7479   | 0     | 1    | 0    | 26  | 3977   | 1917   |
|     | 50        | 0     | 1    | 0.1  | 62  | 6707   | 235     | 0     | 1    | 1.7  | 62  | 92399    | 15477  | 0     | 1    | 0.6  | 62  | 22918  | 5107   |
|     | 100       | 0     | 1    | 0.3  | 122 | 23700  | 448     | 0     | 1    | 7.3  | 122 | 240432   | 19947  | 0     | 1    | 3.5  | 122 | 61989  | 7356   |
|     | 250       | 0     | 1    | 2.7  | 302 | 118046 | 1034    | 0     | 1    | 31.1 | 302 | 618861   | 23808  | 0     | 1    | 11.8 | 302 | 169696 | 9806   |
